# Supplementary material
Source: Springer Nature journal article supplement (https://www.springermedizin.de/resource/supplementary/12885_2012_3637_MOESM2_ESM.pdf/9463958)
Supplement: MOESM2 [file 9463958]

**A** Ba/F3 p185 Bcr-Abl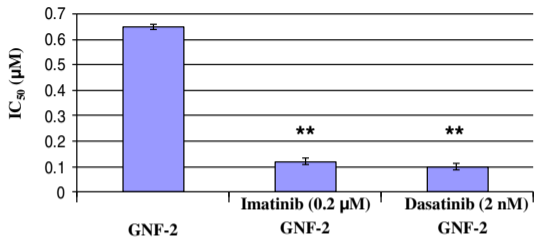**B** Ba/F3 p185 Bcr-Abl T315I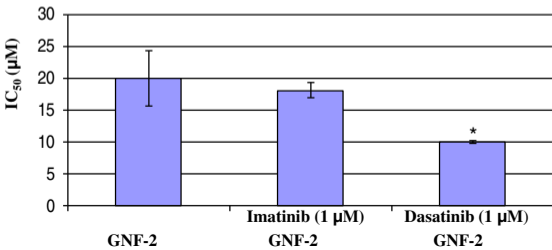**C** Ba/F3 p185 Bcr-Abl

|                               | % of Viable cells |
|-------------------------------|-------------------|
| Untreated                     | 100               |
| Imatinib (0.2 $\mu\text{M}$ ) | 94.96 $\pm$ 3.57  |
| Dasatinib (2nM)               | 84.03 $\pm$ 4.75  |

**D** Ba/F3 p185 Bcr-Abl T315I

|                              | % of Viable cells |
|------------------------------|-------------------|
| Untreated                    | 100               |
| Imatinib (1 $\mu\text{M}$ )  | 95.87 $\pm$ 4.5   |
| Dasatinib (1 $\mu\text{M}$ ) | 79.81 $\pm$ 1.30  |
